# Supplementary material for: Farnesoid X receptor and bile acids regulate vitamin A storage
Source: PubMed Central journal article supplement (PMC6925179; doi:10.1038/s41598-019-55988-w), 2019-12-20
Supplement: 41598_2019_55988_MOESM1_ESM.pdf [file 41598_2019_55988_MOESM1_ESM.pdf]

1 **Farnesoid X receptor and bile acids regulate vitamin A storage**

2 Ali Saeed<sup>1,7§</sup>, Jing Yang<sup>1,6</sup>, Janette Heegsma<sup>1,2</sup>, Albert K. Groen<sup>3</sup>, Saskia W.C. van Mil<sup>5</sup>,  
3 Coen C. Paulusma<sup>4</sup>, Lu Zhou<sup>6</sup>, Bangmao Wang<sup>6</sup>, Klaas Nico Faber<sup>1, 2§</sup>

4  
5 <sup>1</sup>Department of Gastroenterology and Hepatology, <sup>2</sup>Laboratory Medicine, <sup>3</sup>Department of  
6 Pediatrics, Center for Liver, Digestive, and Metabolic Diseases, University Medical Center  
7 Groningen, University of Groningen, Groningen, The Netherlands. <sup>4</sup>Amsterdam UMC,  
8 University of Amsterdam, Tytgat Institute for Liver and Intestinal Research, Amsterdam  
9 Gastroenterology and Metabolism, Amsterdam, the Netherlands. <sup>5</sup>Department of  
10 Molecular Cancer Research, Center for Molecular Medicine, University Medical Center  
11 Utrecht, Utrecht, The Netherlands. <sup>6</sup>Tianjin Medical University General Hospital,  
12 Gastroenterology and Hepatology Department, China. <sup>7</sup>Institute of Molecular Biology and  
13 Biotechnology, Bahauddin Zakariya University Multan, Pakistan.

14  
15 **Running title:** FXR regulates vitamin A storage

16  
17 **Corresponding author:** Ali Saeed and Klaas Nico Faber, Dept. Hepatology &  
18 Gastroenterology, University Medical Center Groningen; Mailing address: Hanzeplein 1,  
19 9713 GZ Groningen, The Netherlands; Tel.: +31(0)503619951, +31(0)503612364; Fax:  
20 +31(0)503619306; email: [a.saeed@umcg.nl](mailto:a.saeed@umcg.nl), [k.n.faber@umcg.nl](mailto:k.n.faber@umcg.nl)

21  
22  
23

24 **Supplementary Figure S1.**

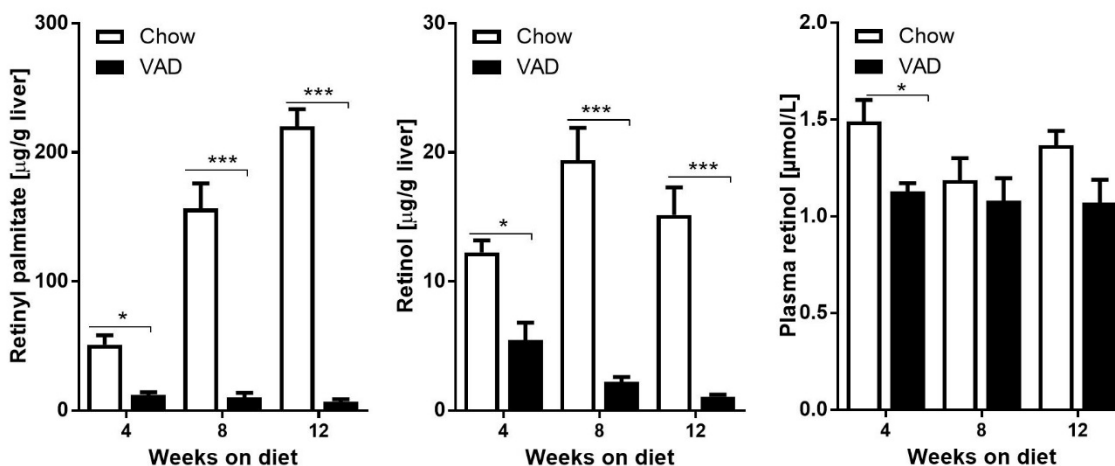

25

26 **Supplementary Figure S1: Hepatic and serum vitamin A level in mice fed-vitamin A deficient diet.**

27 Four (4)-week old mice were fed either a chow diet (H10293G, Hua Fukang Biological, technology, Beijing,

28 China) with 4 IU of retinyl acetate/g as a vitamin A source or a vitamin A deficient (VAD) diet (H10293G,

29 Hua Fukang Biological, technology, Beijing, China). Hepatic Retinol and retinyl palmitate levels were

30 analyzed after 4, 8 and 12 weeks diet. Hepatic retinyl palmitate and retinol levels were significantly reduced

31 already after 4 weeks in mice fed a VAD diet while serum retinol levels were stable in both groups of mice

32 during the whole course of the dietary intervention. Data are presented as Mean $\pm$ SEM and mRNA

33 expression of genes is presented in 2-delta CT which was normalized to *36B4*.

34  
35  
36  
37  
38  
39  
40  
41  
42

43

44 **Supplementary Figure S1.**

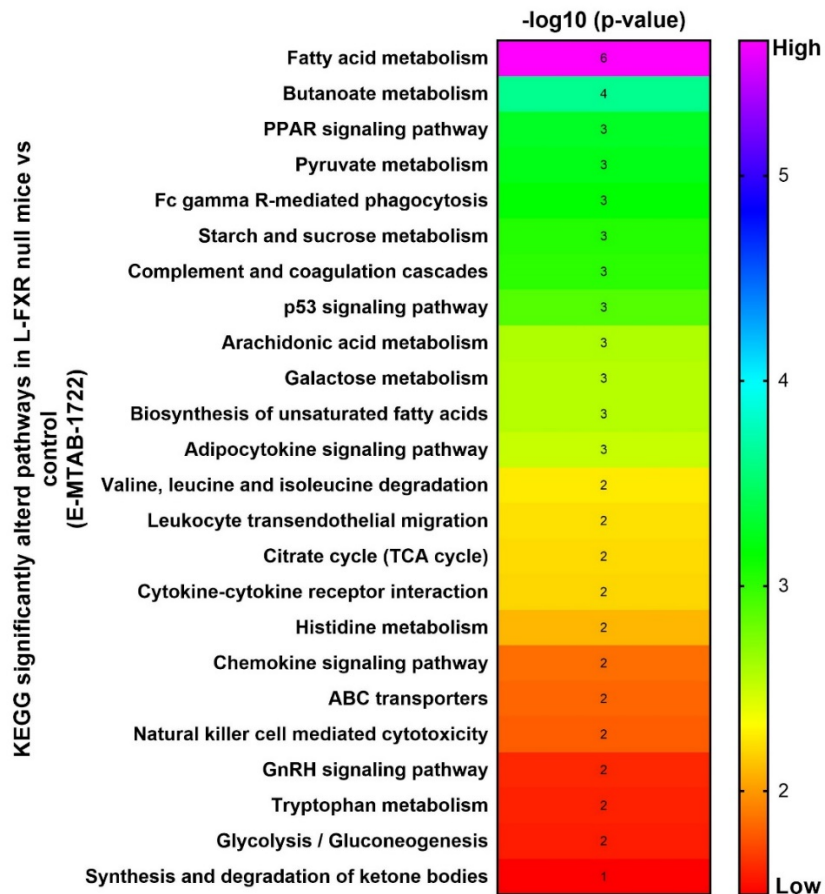

45

46 **Supplementary Figure S2: A heat map of significantly altered KEGG pathway associated with liver-specific FXR deletion.**

48 KEGG analysis of liver-specific FXR-null mice vs wild type mice was performed using online available  
49 DAVID 6.7 software on differentially regulated genes in publicly available microarray data (E-MTAB-1722).  
50 A heat map was generated from the  $-\log_{10}$  p-value of the significantly altered KEGG pathways associated  
51 with liver-specific FXR-deletion vs control. Fatty acid metabolism was the top hit in this analysis, however,  
52 retinol metabolism was not significantly associated with L-FXR deletion in the liver of mice.

53

54 **Supplementary Table S1: Primers and probes used in study for analysis of target genes**

| Gene / ID                                         | Taqman primers and probe                                                                                               |
|---------------------------------------------------|------------------------------------------------------------------------------------------------------------------------|
| <i>36B4</i><br>NM_022402                          | Fwd: 5'-GCTTCATTGTGGGAGCAGACA-3'<br>Rev: 5'-CATGGTGTTCCTTGCCCATCAG-3'<br>Probe: 5'-TCCAAGCAGATGCAGCAGATCCGC-3'         |
| <i>Abcb11 / Bsep</i><br>NM_021022.3               | Fwd: 5'-CTGCCAAGGATGCTAATGCA -3'<br>Rev: 5'-CGATGGCTACCCTTTGCTTCT-3'<br>Probe: 5'-TGCCACAGCAATTTGACACCCTAGTTGG-3'      |
| <i>Acaca / Acc1</i><br>NM_133360.1 / NM_022193.1  | Fwd: 5'-GCCATTGGTATTGGGGCTTAC-3'<br>Rev: 5'-CCCGACCAAGGACTTTGTTG-3'<br>Probe: 5'-CTCAACCTGGATGGTTCTTTGTCCCAGC-3'       |
| <i>Cpt1a</i><br>NM_013495.1                       | Fwd: 5'-CTCAGTGGGAGCGACTCTTCA-3'<br>Rev: 5'-GGCCTCTGTGGTACACGACAA-3'<br>Probe: 5'-CCTGGGGAGGAGACAGACACCATCCAAC-3'      |
| <i>Cyp26a1</i><br>NM_007811.1                     | Fwd: 5'-GGAGACCCTGCGATTGAATC-3'<br>Rev: 5'-GATCTGGTATCCATTAGCTCAA-3'<br>Probe: 5'-TCTTCAGAGCAACCCGAAACCTCC-3'          |
| <i>Dgat1</i><br>NM_010046.2 / NM_053437.1         | Fwd: 5'-GGTGCCCTGACAGAGCAGAT-3'<br>Rev: 5'-CAGTAAGGCCACAGCTGCTG-3'<br>Probe: 5'-CTGCTGCTACATGTGGTTAACCTGGCCA-3'        |
| <i>Dgat2</i><br>NM_026384.2 /<br>NM_001012345.1   | Fwd: 5'-GGGTCCAGAAGAAGTTCAGAAG-3'<br>Rev: 5'-CCCAGGTGTCAGAGGAGAAGAG-3'<br>Probe: 5'-CCCCTGCATCTTCCATGGCCG-3'           |
| <i>Fasn</i><br>NM_007988 / NM_017332              | Fwd: 5'-GGCATCATTGGGCACTCCTT-3'<br>Rev: 5'-GCTGCAAGCACAGCCTCTCT-3'<br>Probe: 5'-CCATCTGCATAGCCACAGGCAACCTC-3'          |
| <i>Fgf21</i><br>NM_020013.4 / NM_130752.1         | Fwd: 5'-CCGCAGTCCAGAAAGTCTCC-3'<br>Rev: 5'-TGACACCCAGGATTTGAATGAC-3'<br>Probe: 5'-CCTGGCTTCAAGGCTTTGAGCTCC A-3'        |
| <i>Lipe / HSL</i><br>NM_010719 / X51415           | Fwd: 5'-GAGGCCTTTGAGATGCCACT-3'<br>Rev: 5'-AGATGAGCCTGGCTAGCACAG-3'<br>Probe: 5'-CCATCTCACCTCCCTTGGCACACAC-3'          |
| <i>Lrat</i><br>NM_023624                          | Fwd: 5'-TCCATACAGCCTACTGTGGAACA-3'<br>Rev: 5'-CTTCACGGTGTGATAGAATTCTCA-3'<br>Probe: 5'-ACTGCAGATATGGCTCTCGGATCAGTCC-3' |
| <i>Nr0b2 / Shp</i>                                | Fwd: 5'-CCTTCTGGAGCCTGGAGCTTA -3'<br>Rev: 5'-CTGGCACATCGGGTTGA-3'<br>Probe: 5'-ATGGTCCCTTTCAAGGCATATTCCTT-3'           |
| <i>Pck1</i><br>NM_011044 / NM_198780              | Fwd: 5'-GTGTCATCCGCAAGCTGAAG-3'<br>Rev: 5'-CTTTGATCCTGGCCACATC-3'<br>Probe: 5'-CAACTGTTGGCTGGCTCTCACTGACCC-3'          |
| <i>Plin2</i><br>NM_175640.2 /<br>NM_001113471.1   | Fwd: 5'-AGAACGTGCTCAGAGAGGTTACAG-3'<br>Rev: 5'-GTGTTCTGCACGGTGTGTACC-3'<br>Probe: 5'-CCTGCCAACCAGAGAGGCC-3'            |
| <i>Ppargc1 α / Pgc1α</i><br>NM_008904 / NM_031347 | Fwd: 5'-GACCCAGAGTCCAAATGA-3'<br>Rev: 5'-GGCCTGCAGTCCAGAGAGT-3'<br>Probe: 5'-CCCCATTTGAGAACAAGACTATTGAGCGAACCC-3'      |
| <i>Pnpla2 / Atgl</i><br>NM_025802 / XM_347183     | Fwd: 5'-AGCATCTGCCAGTATCTGGTGAT-3'<br>Rev: 5'-CACCTGCTCAGACAGTCTGGAA-3'<br>Probe: 5'-ATGGTCACCAATTTCTCTTGCCCC-3'       |
| <i>Pnpla3</i><br>NM_054088                        | Fwd: 5'-ATCATGCTGCCCTGCAGTCT-3'<br>Rev: 5'-GCCACTGGATATCATCCTGGAT-3'<br>Probe: 5'-CACCAGCCTGTGGACTGCAGCG-3'            |
| <i>Raldh1</i>                                     | Assay on demand, Mm00657317_m1 (ThermoFisher)                                                                          |
| <i>Raldh2</i>                                     | Assay on demand, Mm00501306_m1 (ThermoFisher)                                                                          |
| <i>Raldh4</i><br>NM_178713.4                      | Fwd: 5'-TGGAGCAGTCTCTGGAGGAGTT-3'<br>Rev: 5'-GAAGTTCAGAACAGACCCGAGGAA-3'<br>Probe: 5'-AATCTAAAGACCAAGGGAAAACCTCACGC-3' |
| <i>Ucp2</i><br>NM_011671.2                        | Fwd: 5'-CGAAGCCTACAAGACCATTGC-3'<br>Rev: 5'-ACCAGCTCAGCACAGTTGACA-3'<br>Probe: 5'-CAGAGGCCCCGGATCCCTTCC-3'             |

55

56

## 57 **SUPPLEMENTARY MATERIALS AND METHODS**

### 58 **Serum and hepatic vitamin A analysis**

59 Serum and tissue retinoid content (both retinol and retinyl palmitate) was analyzed by  
60 reverse phase HPLC as previously described <sup>1</sup>. Briefly, tissue (30-50 mg) was  
61 homogenized in PBS to create a 15% (w/v) tissue homogenate. Then, tissue homogenate  
62 (66.7 µL equal to 10 mg of tissue) or serum (50 µL) were added in the antioxidant mix  
63 (containing pyrogallol, butylated hydroxytoluene, ethylenediaminetetraacetic acid and  
64 ascorbic acid) and vortexed thoroughly for 1 min. Retinol and retinyl esters were extracted  
65 and deproteinized twice with *n*-hexane in the presence of retinol acetate (100 µL,  
66 concentration 4 µmol/L) as an internal standard to assess the recovery efficiency after the  
67 extraction procedure. Standard curves created from a range of concentrations of retinol  
68 and retinyl palmitate were used to determine absolute tissue and serum concentrations of  
69 these compounds. Additionally, two negative controls (only containing internal standard)  
70 and two positive controls (low and high concentrations of retinol plus internal standard)  
71 were included in each series of extractions. Samples were evaporated under N<sub>2</sub> and  
72 diluted in 300 µL 100% ultrapure ethanol. Then, 50 µL was injected into HPLC (Waters  
73 2795 Alliance HT Separations Module, Connecticut, USA) for phase separation on a C18  
74 column (Waters Symmetry C18, dimension 150 x 3.0 mm, particle size 5 µm, Waters  
75 Corporation, Milford, MA, USA) and measurement (UV-VIS, dual wavelength, UV-4075  
76 Jasco, Tokyo, Japan). Retinoids in samples were identified by exact retention time of  
77 known standards in ultraviolet absorption at 325 nm by HPLC. Finally, retinol and retinyl  
78 palmitate concentrations were calculated and normalized to final volume or tissue weight.

79

80 **Quantitative real-time reverse transcription polymerase chain reaction**

81 Quantitative real-time reverse transcription polymerase chain reaction was performed as  
82 previously described <sup>2</sup>. Shortly, total RNA was isolated from tissue samples using TRIzol<sup>®</sup>  
83 reagent according to supplier's instructions (ThermoFisher Scientific, Breda, The  
84 Netherlands). RNA quality and quantity were determined using a Nanodrop 2000c UV-vis  
85 spectrophotometer (Thermo Fisher Scientific). cDNA was synthesized from 2.5 µg of RNA  
86 by using random nonamers and M-MLV reverse transcriptase (ThermoFisher Scientific).  
87 Taqman primers and probes were designed using Primer Express 3.0.1 (ThermoFisher  
88 Scientific) and are shown in **Supplementary Table S1**. All target genes were amplified  
89 using the Q-PCR core kit master mix (Eurogentec, Maastricht, The Netherlands) on a  
90 7900HT Fast Real-Time PCR system (ThermoFisher Scientific). SDSV2.4.1  
91 (ThermoFisher Scientific) was used to analyze the data. Expression of genes is presented  
92 in  $2^{-\text{delta CT}}$  and normalized to *36B4*.

93 **SDS-PAGE and Western Blotting**

94 Protein samples are prepared for Western blot analysis as described previously <sup>3</sup>. Protein  
95 concentrations were quantified using the Bio-Rad protein assay (Bio-Rad, Hercules, CA,  
96 USA) with bovine serum albumin (BSA) as standard. Equal amounts of protein were  
97 separated on Mini-PROTEAN<sup>®</sup> TGX<sup>™</sup> precast 4-15% gradient gels (Bio-Rad) and  
98 transferred to nitrocellulose membranes using the Trans-Blot turbo transfer system, (Bio-  
99 Rad). Primary antibodies (anti-LRAT, 1:500; # SAB4503589, Sigma-Aldrich), RBP4  
100 (1:2,000; # ab109193, Abcam), ATGL (1:1,000; # 2138, Cell Signaling Technology),  
101 PNPLA3 (1:1,000; #PA5-18901, ThermoFisher, scientific), pHSL (1:1,000# 4126, Cell  
102 Signaling Technology), HSL (# 4107, Cell Signaling Technology), PEPCK1 (1:500;  
103 10004943, Cayman chem. Abcam), CYP7A1 (H-58): sc-25536, SantaCruz), rabbit-NTCP

104 (1:1,000; kind gift from Dr. B. Stieger, Zurich, Switzerland <sup>4</sup>), anti-GAPDH, (1:40,000  
105 #CB1001, Calbiochem, Merck-Millipore Amsterdam-Zuidoost, The Netherland) and  
106 horseradish peroxidase (HRP)-conjugated secondary antibody (1:2,000; DAKO,  
107 Amstelveen, The Netherlands) were used for detection. Proteins were detected using the  
108 pierce ECL Western blotting kit (ThermoFisher scientific). Images were captured using  
109 the chemidoc XRS system and Image Lab version 3.0, (Bio-Rad). The intensity of bands  
110 was quantified using ImageJ version 1.51 (NIH, USA).

### 111 **Microscopy**

112 Hematoxylin and Eosin (H&E) staining on liver sections (4  $\mu$ m) was performed on snap-  
113 frozen liver sections as previously described <sup>5</sup>. Immunohistochemistry was performed on  
114 the paraffin-embedded liver tissue. Briefly, after deparaffinization, antigen retrieval was  
115 performed by using microwave irradiation in citrate buffer, pH 6.0 and blocking of  
116 endogenous peroxidase with 0.3% H<sub>2</sub>O<sub>2</sub> for 30 min. Primary antibodies used were rabbit  
117 anti-mouse LRAT (#28075 Takara, Japan). Horse peroxidase-conjugated goat anti-rabbit  
118 secondary antibody and rabbit anti-goat tertiary antibodies were used. Slides were stained  
119 with the Vector<sup>®</sup> NovaRED<sup>™</sup> substrate Kit (# SK-4800, Vector Laboratories, Inc., USA)  
120 for 10 min and Haematoxylin was used as a counter nuclear stain for 2 min at room  
121 temperature. Finally, slides were dehydrated and mounted with Eukitt<sup>®</sup> (Sigma-Aldrich).  
122 Slides were scanned on a nanozoomer 2.0 digital slide scanner (C9600-12, Hamamatsu  
123 Photonics, Hamamatsu, Japan) and analyzed using Aperio ImageScope (version 11.1,  
124 Leica Microsystems, Amsterdam, The Netherlands). Autofluorescence analysis was  
125 performed on unstained cryostatic liver sections using a Leica CTR 6000 FS fluorescence  
126 microscope (Leica Microsystems, Amsterdam, The Netherlands) as previously described

127 <sup>6,7</sup>. Briefly, cryostat liver sections were illuminated with an excitation filter of 366 nm band-  
128 pass interference, and spectra were recorded in the range of 400-680 nm with spectrum  
129 acquisition from 0.2 to 3 seconds.

## 130 REFERENCES

- 131 1. Kim, Y.-K. & Quadro, L. Reverse-phase high-performance liquid chromatography  
132 (HPLC) analysis of retinol and retinyl esters in mouse serum and tissues. *Methods*  
133 *Mol. Biol. Clifton NJ* **652**, 263–275 (2010).
- 134 2. Blokzijl, H. *et al.* Decreased P-glycoprotein (P-gp/MDR1) expression in inflamed  
135 human intestinal epithelium is independent of PXR protein levels. *Inflamm. Bowel*  
136 *Dis.* **13**, 710–720 (2007).
- 137 3. Pellicoro, A. *et al.* Human and rat bile acid-CoA:amino acid N-acyltransferase are  
138 liver-specific peroxisomal enzymes: implications for intracellular bile salt transport.  
139 *Hepatol. Baltim. Md* **45**, 340–348 (2007).
- 140 4. Stieger, B. *et al.* In situ localization of the hepatocytic Na<sup>+</sup>/Taurocholate  
141 cotransporting polypeptide in rat liver. *Gastroenterology* **107**, 1781–1787 (1994).
- 142 5. Fischer, A. H., Jacobson, K. A., Rose, J. & Zeller, R. Hematoxylin and eosin staining  
143 of tissue and cell sections. *CSH Protoc.* **2008**, pdb.prot4986 (2008).
- 144 6. Croce, A. C. *et al.* Human liver autofluorescence: an intrinsic tissue parameter  
145 discriminating normal and diseased conditions. *Lasers Surg. Med.* **42**, 371–378  
146 (2010).
- 147 7. Croce, A. C. *et al.* Liver autofluorescence properties in animal model under altered  
148 nutritional conditions. *Photochem. Photobiol. Sci. Off. J. Eur. Photochem. Assoc. Eur.*  
149 *Soc. Photobiol.* **7**, 1046–1053 (2008).
- 150
